# Supplementary material for: Unusual Lower Critical Solution Temperature Phase Behavior of Poly(benzyl methacrylate) in a Pyrrolidinium-Based Ionic Liquid
Source: MDPI journal article supplement (doi:10.3390/molecules26164850), 2021-08-11
Supplement: s1 [file s1]

SUPPLEMENTARY MATERIALS FOR

Unusual Lower Critical Solution Temperature Phase Behavior  
of Poly(benzyl methacrylate) in a Pyrrolidinium-Based Ionic Liquid

Brian R. Carrick<sup>†‡</sup>, Claire L. Seitzinger<sup>†</sup>, and Timothy P. Lodge<sup>†‡\*</sup>

<sup>†</sup> Department of Chemistry, University of Minnesota, Minneapolis, Minnesota 55455-0431,  
United States

<sup>‡</sup> Department of Chemical Engineering and Materials Science, University of Minnesota,  
Minneapolis, Minnesota 55455-0431, United States

\* Corresponding Author: [lodge@umn.edu](mailto:lodge@umn.edu)

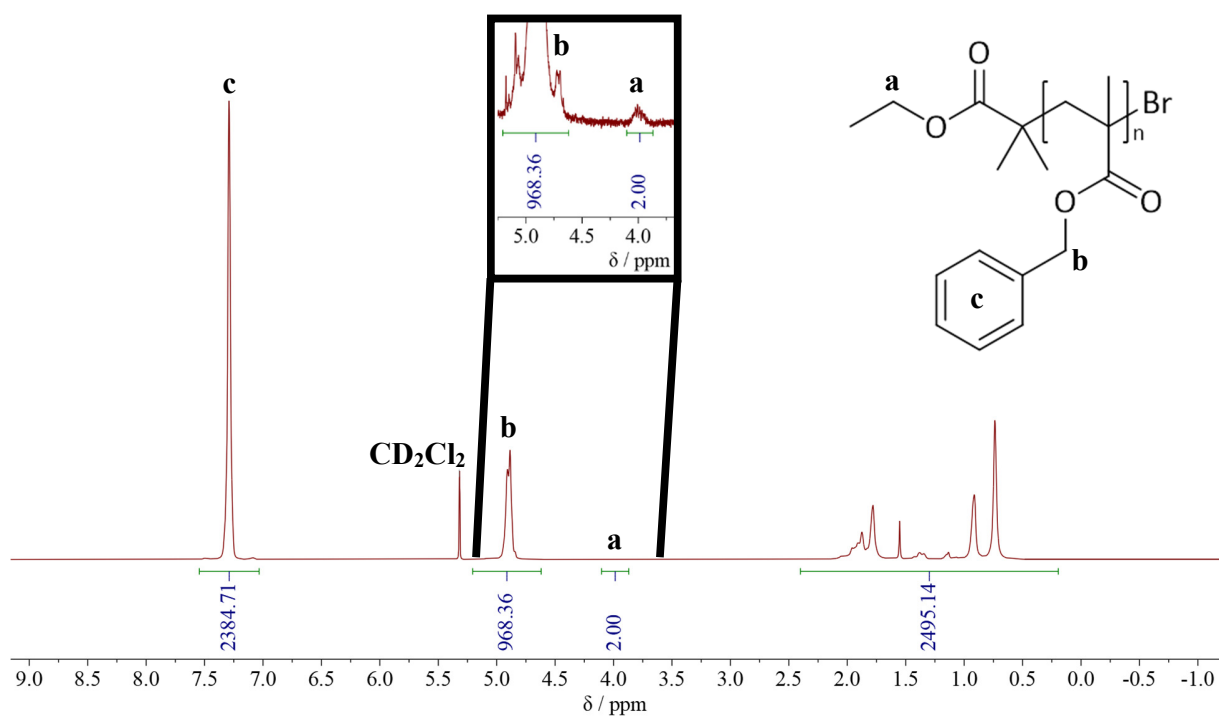

**Figure S1:** Annotated  $^1\text{H}$  NMR spectrum of PBzMA-76 in  $\text{CD}_2\text{Cl}_2$ .

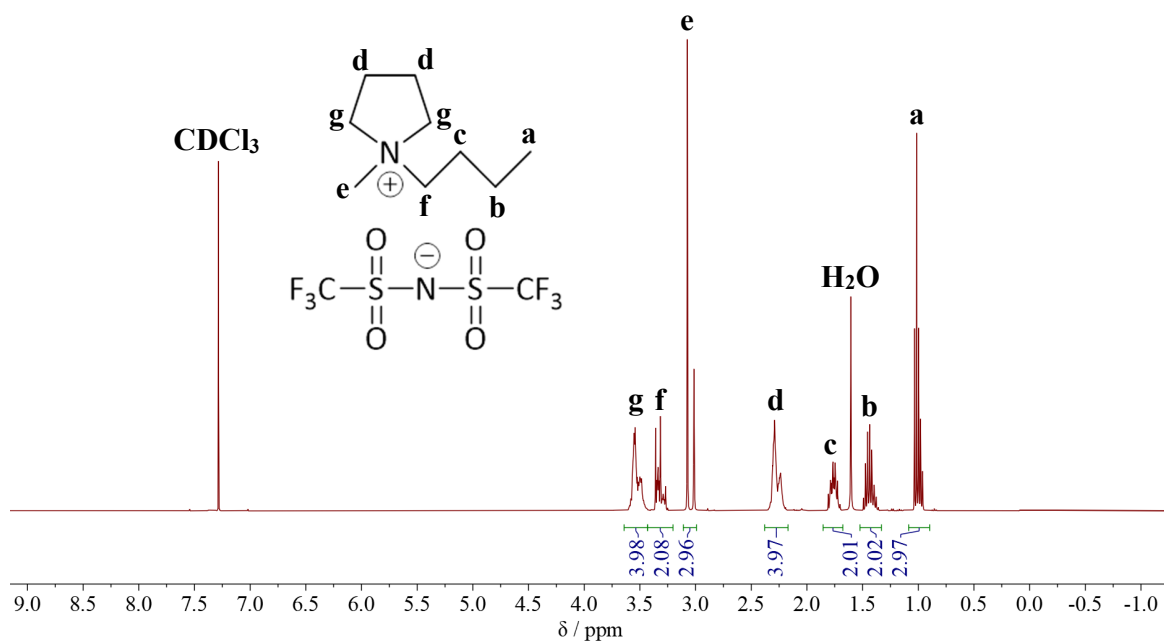

**Figure S2:** Annotated  $^1\text{H}$  NMR spectrum of [BMP][TFSI] in  $\text{CDCl}_3$ .

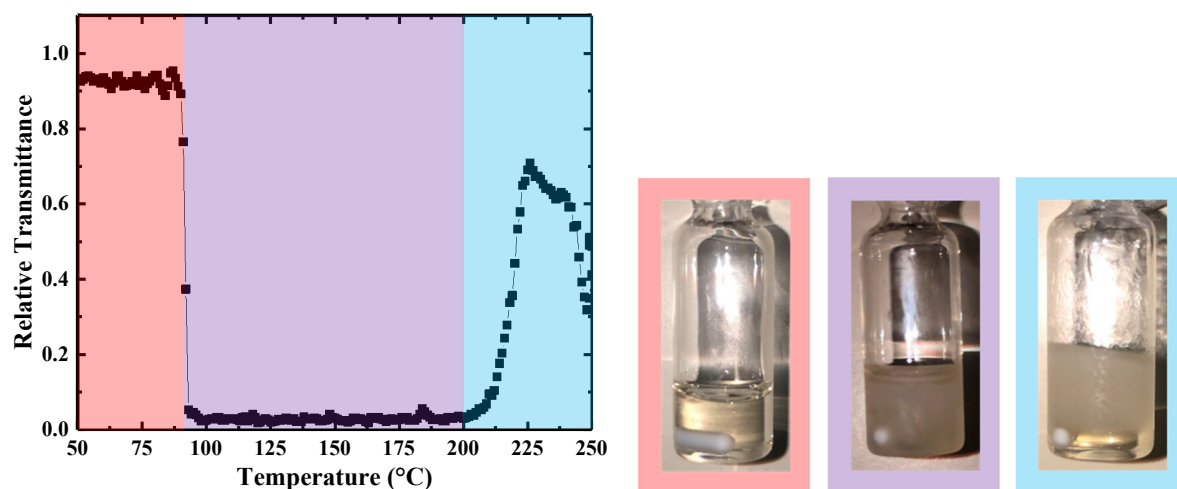

**Figure S3:** Temperature dependence of relative transmittance for 40 wt% PBzMA-63 in [BMP][TFSI] at a heating rate of 1 °C/min. The images represent the solutions at stages characterized by the corresponding colored regimes on the graph ordered from left to right: (red) a homogenous, single phase solution, (purple) a biphasic mixture during phase separation, and (blue) PBzMA-rich biphasic top layer with a [BMP][TFSI]-rich bottom layer. The solid line serves as a guide to the eye.
